# Supplementary material for: High energy conformers of M+(APE)(H2O)0–1Ar0–1 clusters revealed by combined IR-PD and DFT-MD anharmonic vibrational spectroscopy
Source: Royal Society of Chemistry journal article supplement (doi:10.1039/c4cp01275e), 2014-01-01
Supplement: c4cp01275e1.pdf [file c4cp01275e1.pdf]

## Supplementary Material

### High energy conformers of $M^+(APE)(H_2O)_{0-1}Ar_{0-1}$ clusters revealed by combined IR-PD and DFT-MD anharmonic vibrational spectroscopy

V. Brites<sup>†</sup>, A.L. Nicely<sup>‡</sup>, N. Sieffert<sup>§</sup>, M.-P. Gaigeot<sup>†,¶</sup>, and J.M. Lisy<sup>‡</sup>

<sup>†</sup> Laboratoire Analyse et Modélisation pour la Biologie et l'Environnement, LAMBE UMR 8587 CNRS, Université d'Evry Val d'Essonne, 91025 Evry, France.  
Email: mgaigeot@univ-evry.fr

<sup>‡</sup> Department of Chemistry, University of Illinois at Urbana-Champaign, Urbana, Illinois 61801, USA.  
Email: j-lisy@illinois.edu

<sup>§</sup> Université Joseph Fourier Grenoble I, CNRS UMR 5250, Grenoble, France.

<sup>¶</sup> Institut Universitaire de France IUF, 103 Blvd St Michel, 75005 Paris, France.

**Figure S1:** Evolution of the Gibbs free energy difference between the  $\text{Na}^+(\text{APE})$  (left) and  $\text{K}^+(\text{APE})$  (right) conformers computed at the MP2/TZVPP level of theory.

**Figure S2:** VDOS analysis of the  $\text{AG}_1\text{-Na}^+(\text{add})$  (left) and  $\text{AG}_1\text{-K}^+(\text{add})$  (right) dynamical IR spectrum. VDOS relative intensities are scaled in order to be compared with the IR.

**Figure S3:** Evolution of the Gibbs free energy difference between the  $\text{Na}^+(\text{APE})(\text{H}_2\text{O})$  (left) and  $\text{K}^+(\text{APE})(\text{H}_2\text{O})$  (right) conformers computed at the MP2/TZVPP level of theory.

**Figure S4:** VDOS analysis of the  $\text{AG}_1\text{-Na}^+\text{W}(\text{add}_2)$  (left) and  $\text{AG}_1\text{-K}^+\text{W}(\text{add}_2)$  (right) dynamical IR spectrum at 100K. VDOS relative intensities are scaled in order to be compared with the IR.

**Figure S5:** VDOS analysis of the  $\text{AG}_1\text{-Na}^+\text{W}(\text{ins}_1)$  (left) at 300 K and  $\text{AG}_1\text{-K}^+\text{W}(\text{add}_2)$  (right) at 250 K dynamical IR spectrum. VDOS relative intensities are scaled in order to be compared with the IR.

**Figure S6:** Harmonic spectrum of the  $\text{Na}^+(\text{APE})$  (left) and  $\text{K}^+(\text{APE})$  (right) conformers computed at the MP2/TZVPP level of theory.

**Figure S7:** Harmonic spectrum of the  $\text{Na}^+(\text{APE})(\text{H}_2\text{O})$  (left) and  $\text{K}^+(\text{APE})(\text{H}_2\text{O})$  (right) conformers computed at the MP2/TZVPP level of theory.

**Figure S8:** MP2/TZVPP optimized structure of the transition state between the  $\text{Na}^+\text{-AG}_1$  "addition" and "insertion" structures.

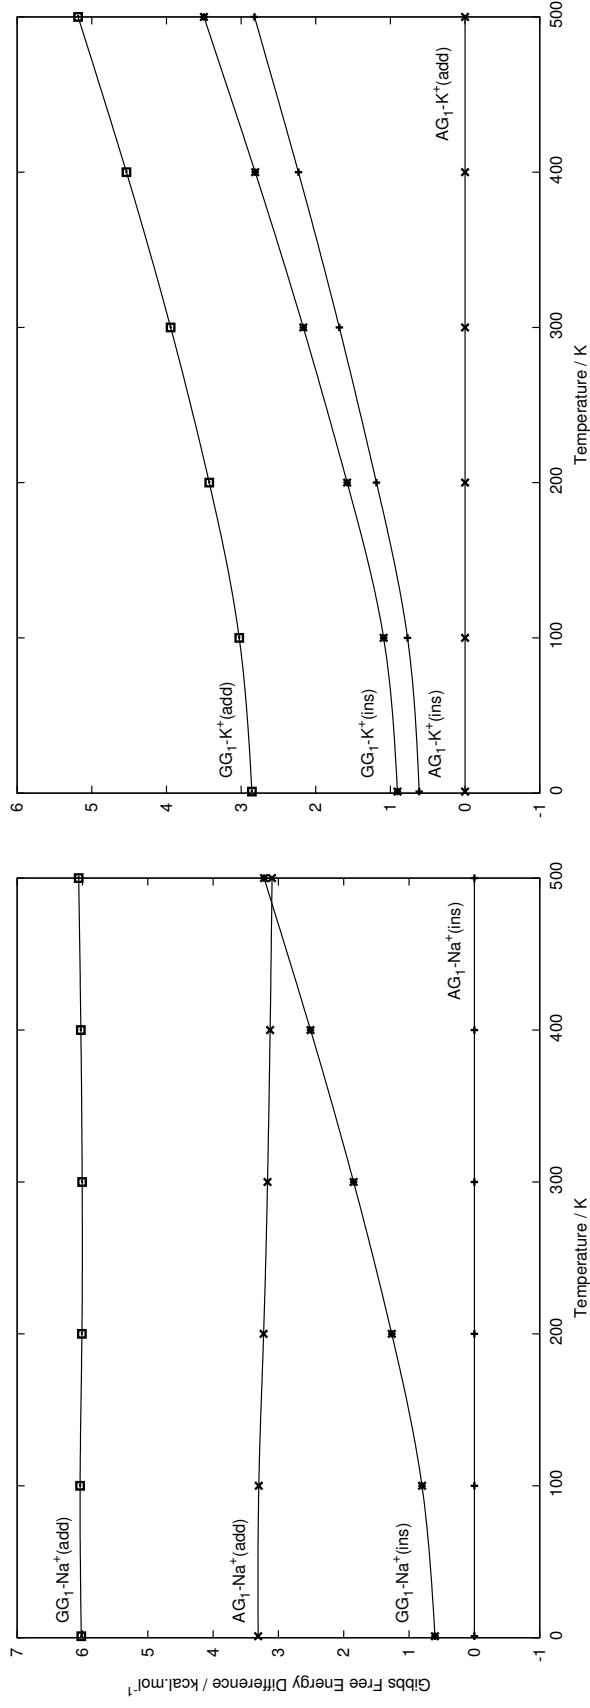

Figure S1: Evolution of the Gibbs free energy difference between the Na<sup>+</sup> (APE) (left) and K<sup>+</sup> (APE) (right) conformers computed at the MP2/TZVPP level of theory.

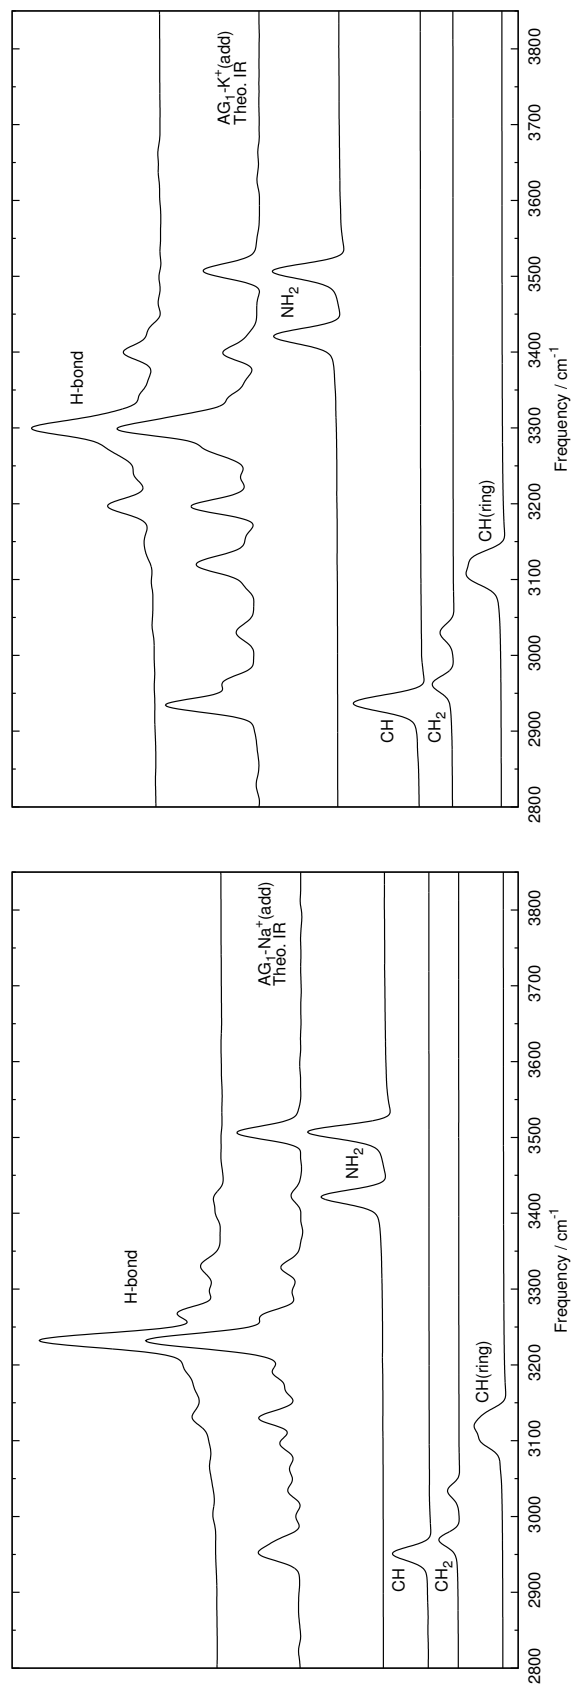

Figure S2: VDOS analysis of the AG<sub>1</sub>-Na<sup>+</sup>(add) (left) and AG<sub>1</sub>-K<sup>+</sup>(add) (right) dynamical IR spectrum. VDOS relative intensities are scaled in order to be compared with the IR.

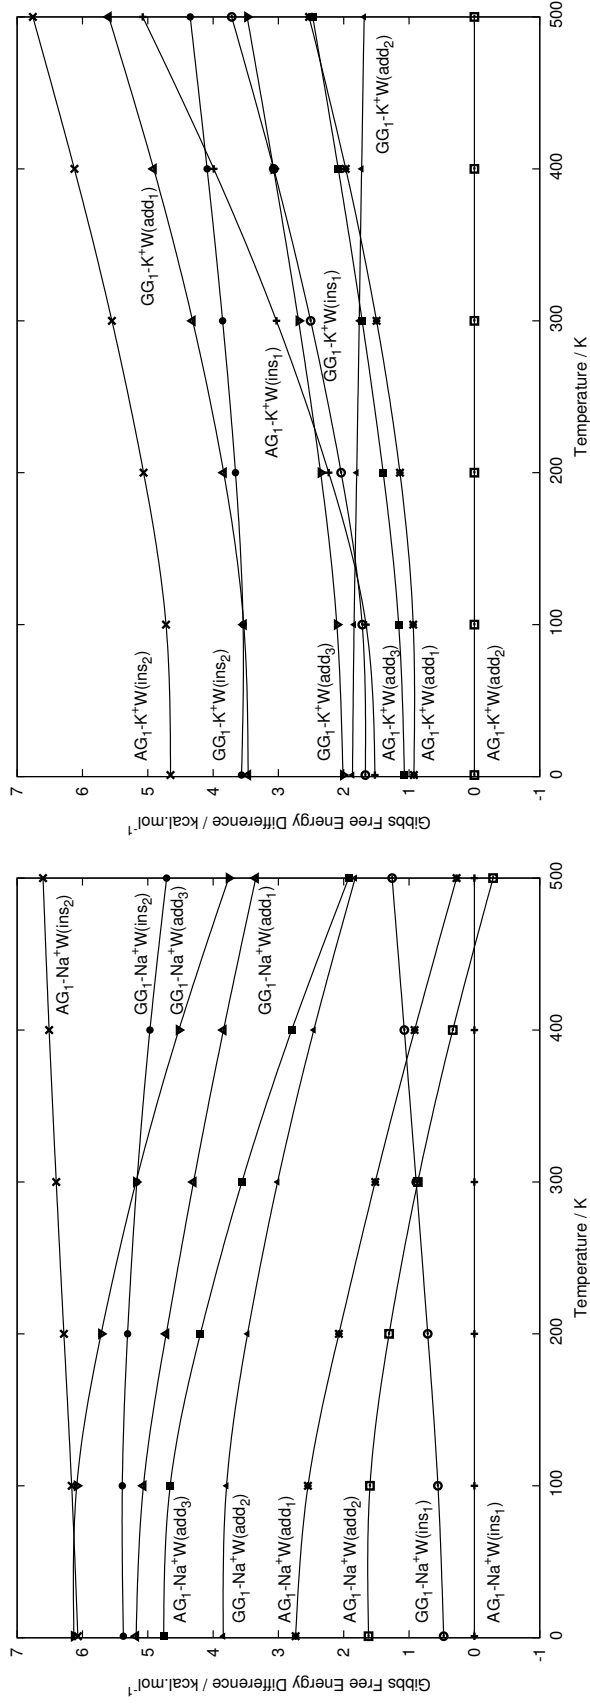

Figure S3: Evolution of the Gibbs free energy difference between the Na<sup>+</sup>(APE)(H<sub>2</sub>O) (left) and K<sup>+</sup>(APE)(H<sub>2</sub>O) (right) conformers computed at the MP2/TZVPP level of theory.

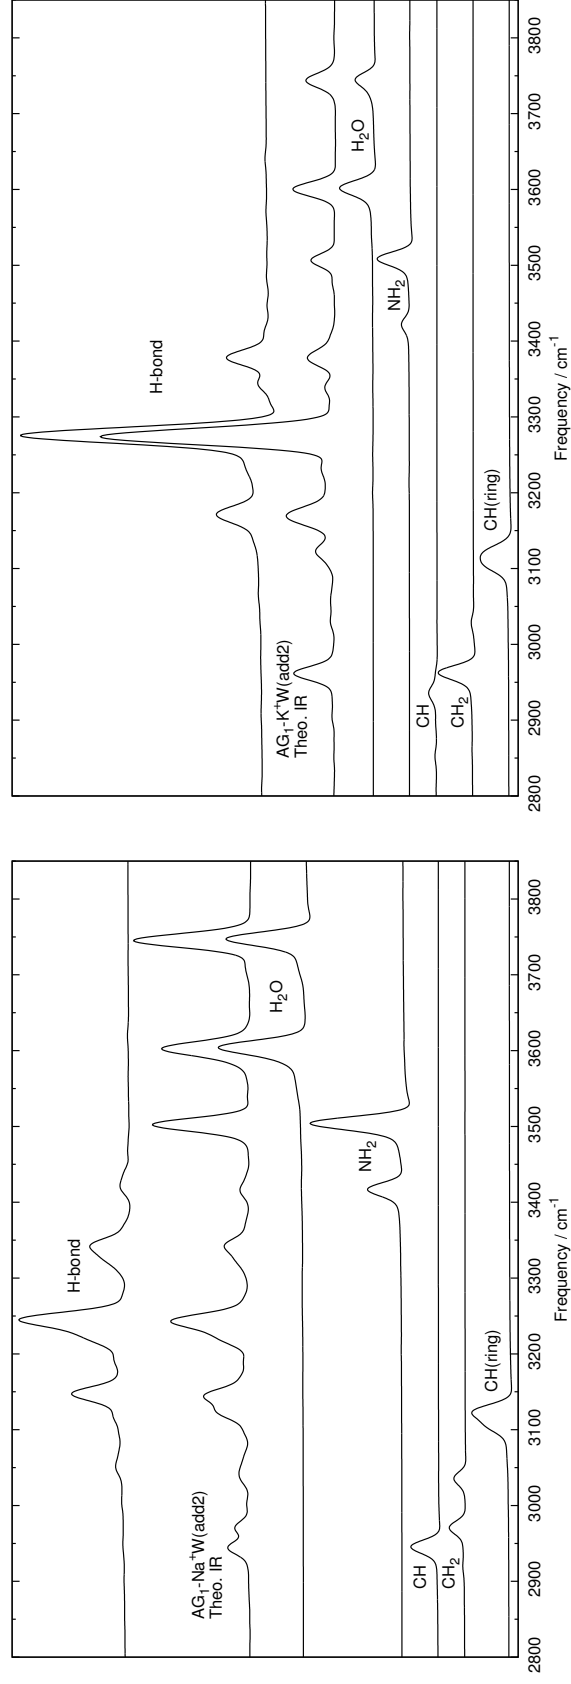

Figure S4: VDOS analysis of the AG<sub>1</sub>-Na<sup>+</sup>W(add<sub>2</sub>) (left) and AG<sub>1</sub>-K<sup>+</sup>W(add<sub>2</sub>) (right) dynamical IR spectrum at 100K. VDOS relative intensities are scaled in order to be compared with the IR.

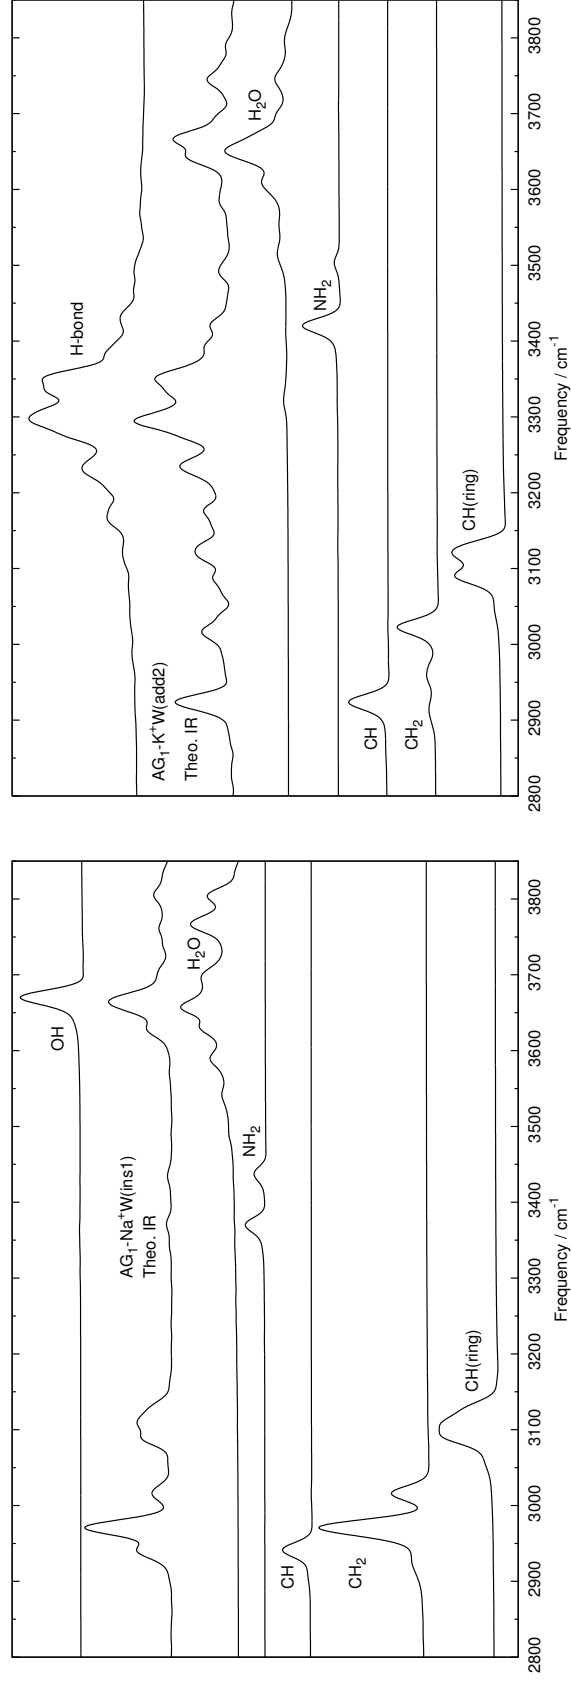

Figure S5: VDOS analysis of the AG<sub>1</sub>-Na<sup>+</sup>W(ins<sub>1</sub>) (left) at 300 K and AG<sub>1</sub>-K<sup>+</sup>W(add<sub>2</sub>) (right) at 250 K dynamical IR spectrum. VDOS relative intensities are scaled in order to be compared with the IR.

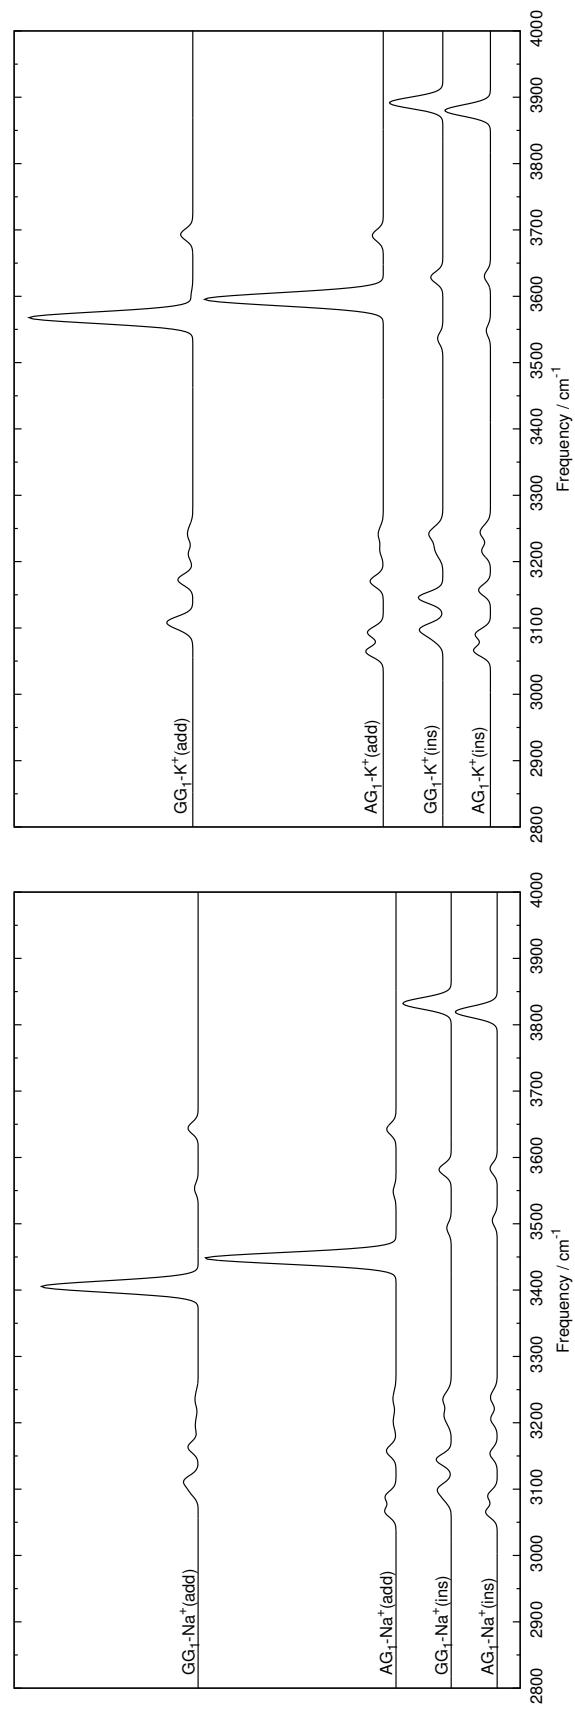

Figure S6: Harmonic spectrum of the  $\text{Na}^+$  (APE) (left) and  $\text{K}^+$  (APE) (right) conformers computed at the MP2/TZVPP level of theory.



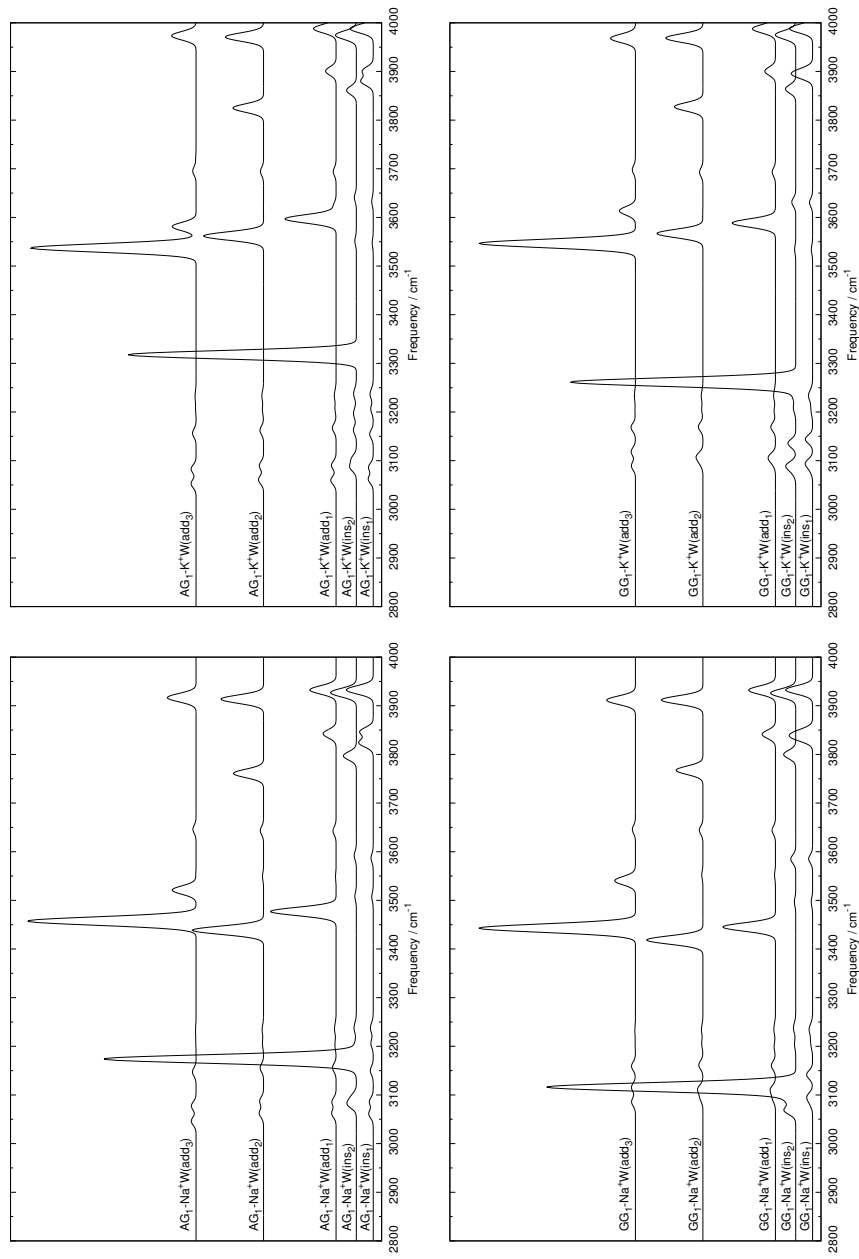

Figure S7: Harmonic spectrum of the Na<sup>+</sup>(APE)(H<sub>2</sub>O) (left) and K<sup>+</sup>(APE)(H<sub>2</sub>O) (right) conformers computed at the MP2/TZVPP level of theory.

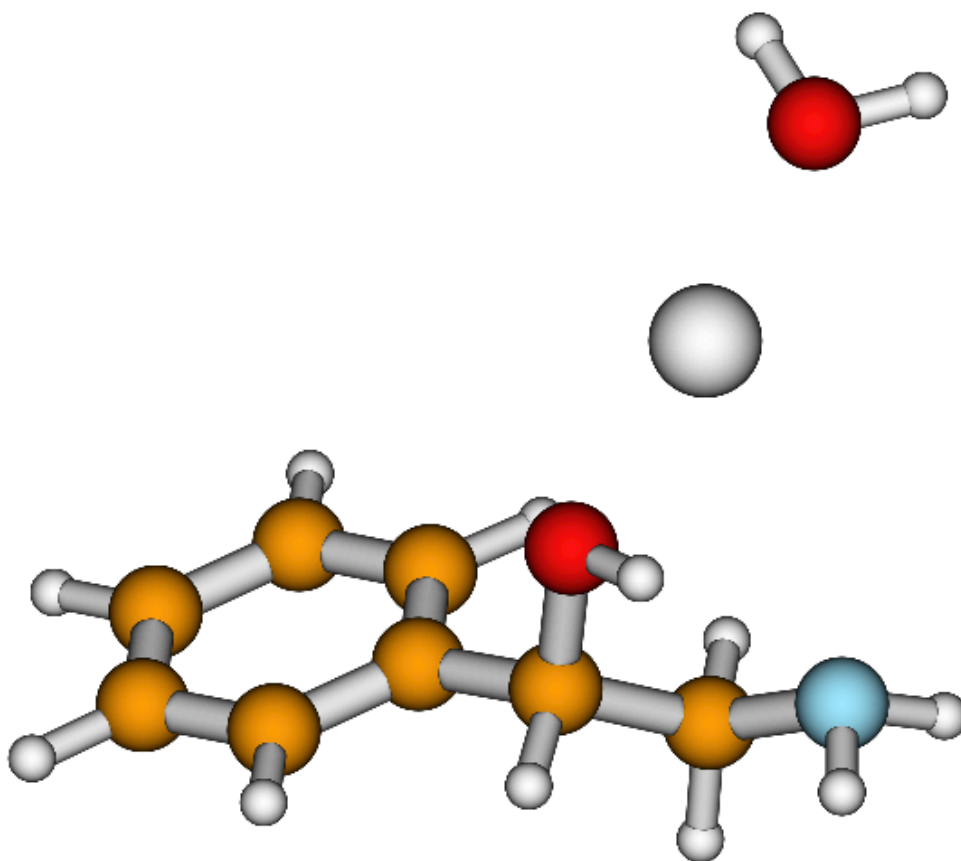

Figure S8: MP2/TZVPP optimized structure of the transition state between the  $\text{Na}^+$ -AG<sub>1</sub> "addition" and "insertion" structures.
